# Supplementary material for: Coding of medically unexplained symptoms and somatoform disorders by general practitioners – an exploratory focus group study
Source: Springer Nature journal article supplement (doi:10.1186/s12875-018-0812-8), 2018-07-27
Supplement: MOESM1 [file 15983222]

Focus group guideline (Project: "Identification of barriers and difficulties involved in the process of diagnosing somatic symptom disorders in primary care")

|                                                                                                                                                                                                                                                                                                                                                                                                                                                                                                                                                                                                                                                                                                                  |
|------------------------------------------------------------------------------------------------------------------------------------------------------------------------------------------------------------------------------------------------------------------------------------------------------------------------------------------------------------------------------------------------------------------------------------------------------------------------------------------------------------------------------------------------------------------------------------------------------------------------------------------------------------------------------------------------------------------|
| A) Presentation of the first part of the vignette                                                                                                                                                                                                                                                                                                                                                                                                                                                                                                                                                                                                                                                                |
| A1) Which problems/difficulties do you face at this point?<br>A2) What would you do with this patient?                                                                                                                                                                                                                                                                                                                                                                                                                                                                                                                                                                                                           |
| B) Presentation of the second part of the vignette                                                                                                                                                                                                                                                                                                                                                                                                                                                                                                                                                                                                                                                               |
| B1) Which problems/difficulties do you face now?<br>B2) What impedes diagnosing a somatoform disorder for this patient?<br>B3) How do you recognize such a disorder?<br>B4) How do you document such a disorder?<br>B5) How do you communicate your (suspected) diagnosis to the patient?<br>B6) Which feelings and behaviors does the patient's behavior elicit in you?                                                                                                                                                                                                                                                                                                                                         |
| C) Empirical studies name different possible consequences of a delayed diagnosis of somatoform disorders: unnecessary somatic diagnostics, delayed start of treatment, iatrogenic harm, e.g. through unnecessary invasive diagnostics or operations. Being a general practitioner you have an important function in the management of these patients. Therefore we are interested to hear your thoughts on the following aspects:<br>C1) How do you identify a patient having a somatoform disorder?<br>C2) Which aids do you use to identify these patients?<br>C3) What would help you to diagnose a somatoform disorder?<br>C4) How do the ICD-10 criteria influence your daily practice with these patients? |
